# Supplementary material for: Crystalline phase-controlled synthesis of regular and stable endotaxial cesium lead halide nanocrystals
Source: Royal Society of Chemistry journal article supplement (doi:10.1039/d0tc01604g), 2020-01-01
Supplement: d0tc01604g1.pdf [file d0tc01604g1.pdf]

## Supplementary Information for

# Crystalline Phase-Controlled Synthesis of Regular and Stable Endotaxial Cesium Lead Halide Nanocrystals

Peng Zeng,<sup>#a,b</sup> Linfeng Wei,<sup>#a,b</sup> Haifeng Zhao,<sup>a,b</sup> Rui Zhang,<sup>c</sup> Hongting Chen,<sup>c</sup> Mingzhen Liu<sup>\*a,b</sup>

*a School of Materials and Energy, University of Electronic Science and Technology, Chengdu 611731, China*

*b Center for Applied Chemistry, University of Electronic Science and Technology, Chengdu 611731, China*

*c Wuhan National Laboratory for Optoelectronics, Huazhong University of Science and Technology, Wuhan 430074, China.*

*# Authors contributed equally to this work.*

*\* mingzhen.liu@uestc.edu.cn*

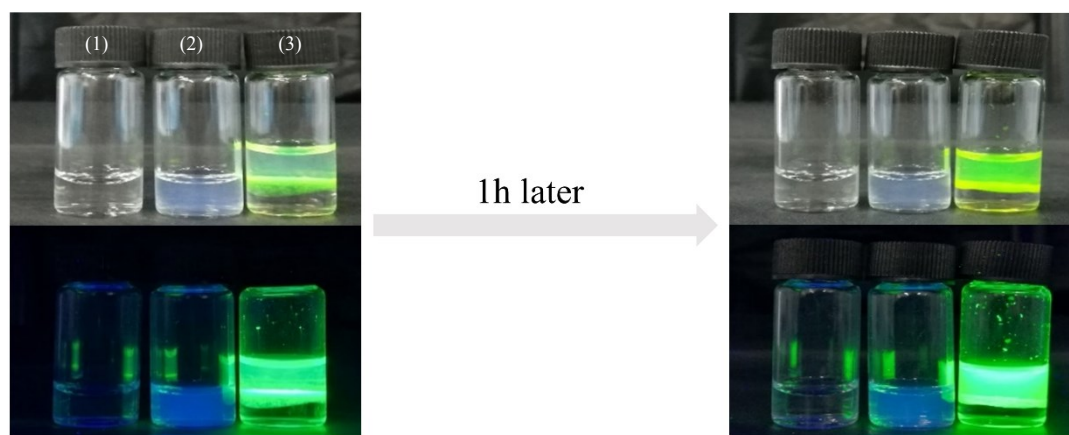

**Figure S1.** Photographs showing the transformation process of  $\text{Cs}_4\text{PbBr}_6$  NCs to  $\text{CsPbBr}_3$  NCs. The samples were illuminated with natural light (top) and UV 365nm irradiation (bottom). (1) Water, (2)  $\text{Cs}_4\text{PbBr}_6$  nanocrystals dispersed in octane. (3) Solution with injecting  $\text{Cs}_4\text{PbBr}_6$  nanocrystals into water

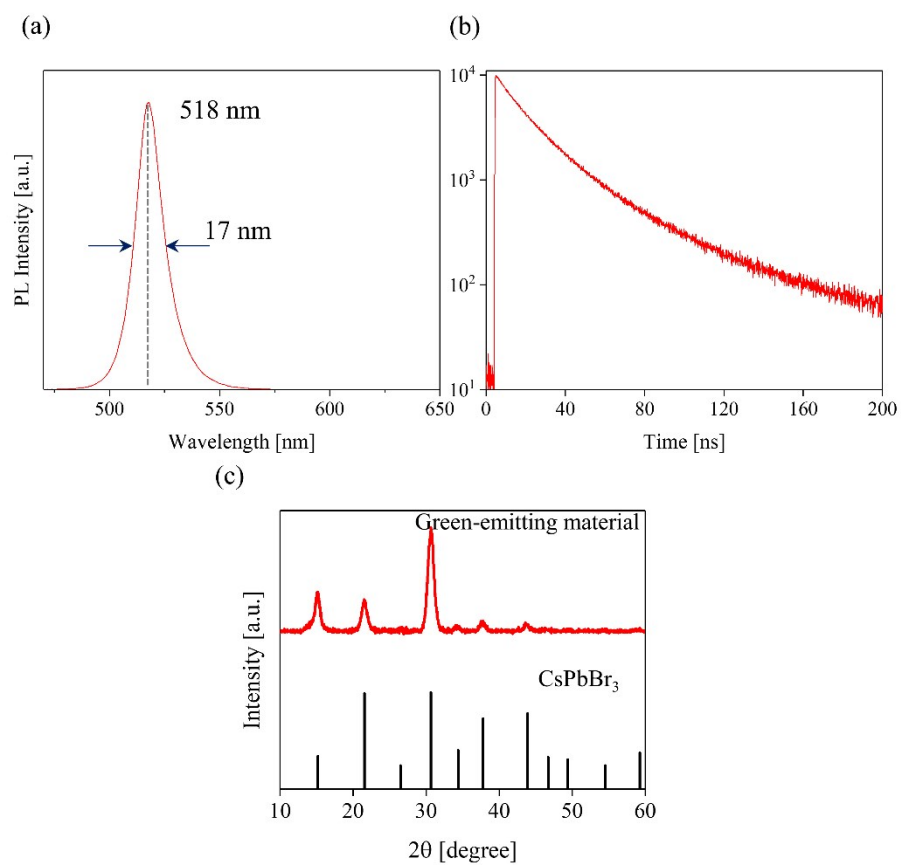

**Figure S2.** (a) PL emission spectra; (b) Time-resolved PL and (c) XRD patterns of supernatant of the mixture of  $\text{Cs}_4\text{PbBr}_6$  octane solution and water.

(a)

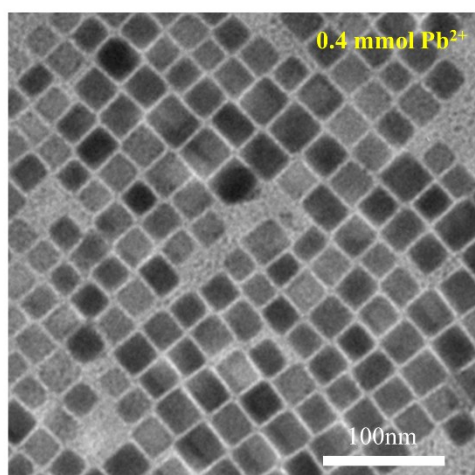

Reaction time:5s

(b)

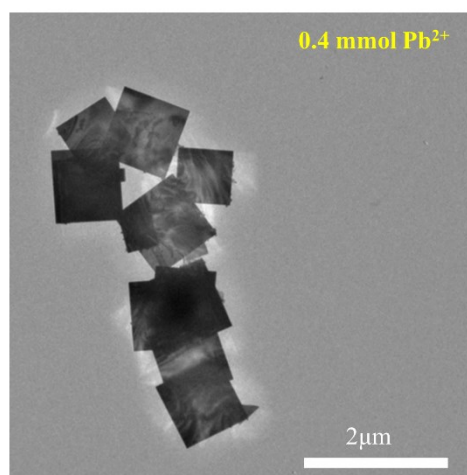

Reaction time:1h

**Figure S3.** TEM images of nanocrystals synthesized both with 0.4 mmol Pb but different reaction time: (a) 5 s and (b) 1 h

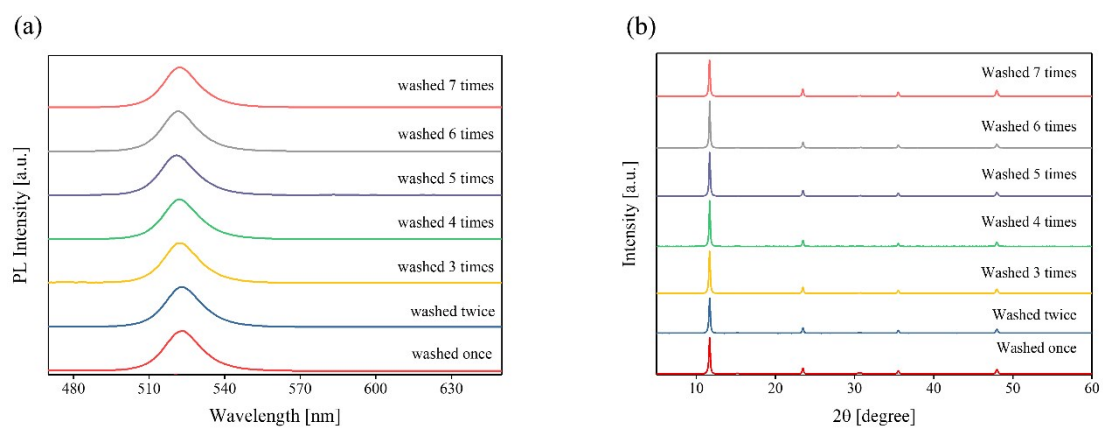

**Figure S4.** (a) PL emission spectra of CsPb<sub>2</sub>Br<sub>5</sub> NSs dispersed in toluene with different washing cycles. (b) Corresponding XRD patterns of the samples in (a).

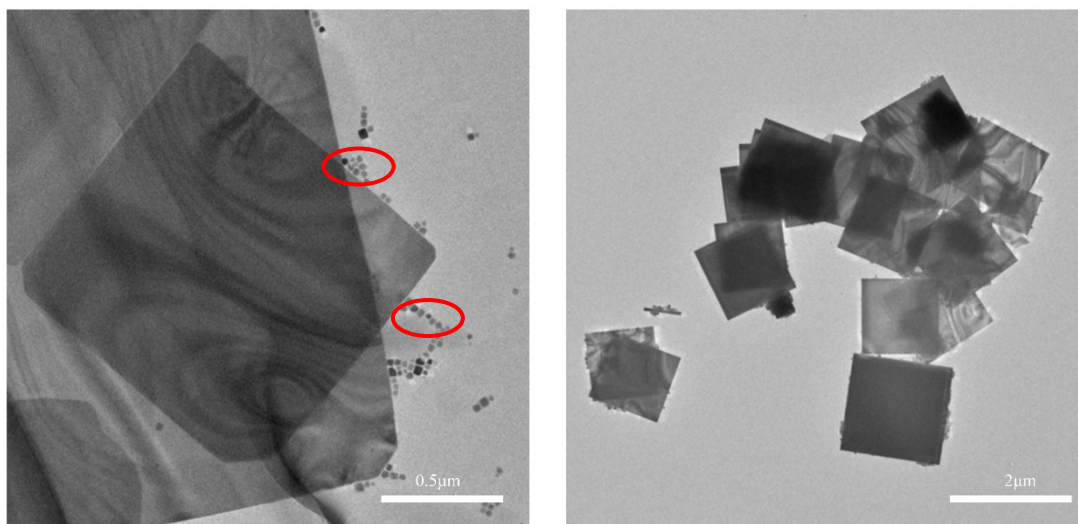

**Figure S5.** (a) TEM images of NSs synthesized with 0.3mmol  $\text{Pb}^{2+}$  (left) and 0.4mmol  $\text{Pb}^{2+}$  (right).

Time-resolved PL decays were fitted to

$$A(t) = A_1 \exp\left(-\frac{t}{\tau_1}\right) + A_2 \exp\left(-\frac{t}{\tau_2}\right) + A_3 \exp\left(-\frac{t}{\tau_3}\right). \quad (1)$$

The average lifetimes were calculated using the intensity-weighted model as

$$\tau = (A_1 \tau_1^2 + A_2 \tau_2^2 + A_3 \tau_3^2) / (A_1 \tau_1 + A_2 \tau_2 + A_3 \tau_3). \quad (2)$$

**Table S1.** The fitting results of PL decay for nanocrystals synthesized with 0.1mmol,

|                  | 0.1 mmol Pb <sup>2+</sup> | 0.3 mmol Pb <sup>2+</sup> | 0.4 mmol Pb <sup>2+</sup> |
|------------------|---------------------------|---------------------------|---------------------------|
| A <sub>1</sub>   | 5005.0                    | 323.9                     | 307.1                     |
| τ <sub>1</sub>   | 6.97                      | 149.31                    | 232.55                    |
| A <sub>2</sub>   | 3544.0                    | 3135.3                    | 2776.5                    |
| τ <sub>2</sub>   | 2.94                      | 30.93                     | 40.76                     |
| A <sub>3</sub>   | 412.5                     | 5344.0                    | 5367.0                    |
| τ <sub>3</sub>   | 16.67                     | 7.21                      | 9.55                      |
| τ <sub>ave</sub> | 7.44                      | 57.10                     | 92.05                     |

0.3mmol and 0.4mmol Pb<sup>2+</sup>, respectively.

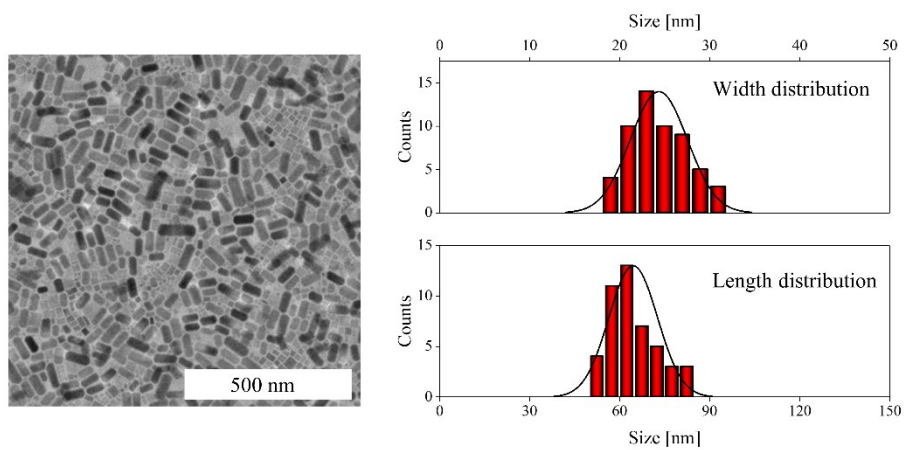

**Figure S6.** TEM images of hexagonal nanorods and histograms of length and width distributions.



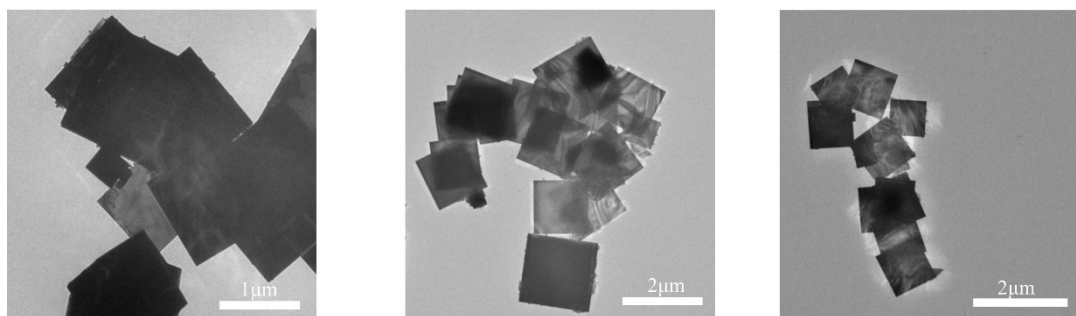

**Figure S7.** TEM images of pure CsPb<sub>2</sub>Br<sub>5</sub> NSs with 7 washing cycles showing no obvious CsPbBr<sub>3</sub> NCs.

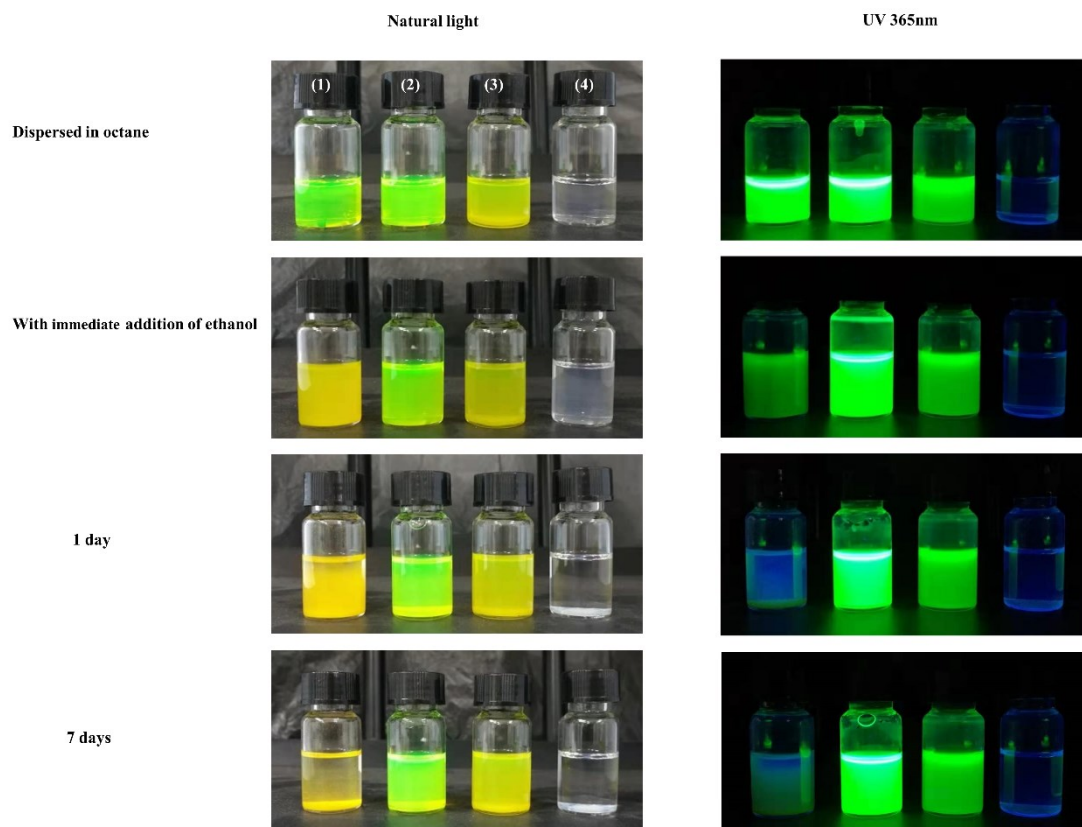

**Figure S8.** Photographs of (1) OAm-capped CsPbBr<sub>3</sub>, (2) APTES-capped CsPbBr<sub>3</sub>, (3) APTES-capped CsPb<sub>2</sub>Br<sub>5</sub> and (4) APTES-capped Cs<sub>4</sub>PbBr<sub>6</sub> nanocrystals under natural light (left) and UV 365nm irradiation (right) without (top) and with (bottom) addition of ethanol

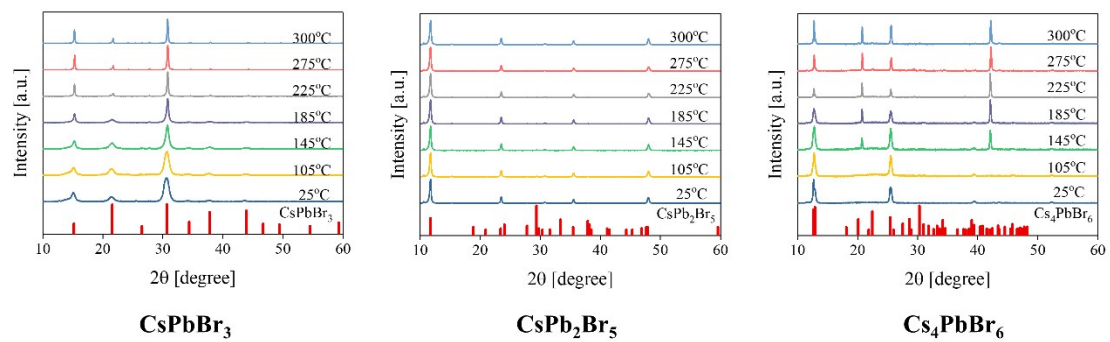

**Figure S9.** XRD patterns for  $\text{CsPbBr}_3$ ,  $\text{CsPb}_2\text{Br}_5$  and  $\text{Cs}_4\text{PbBr}_6$  deposited on glass films after a heating process at different temperature.

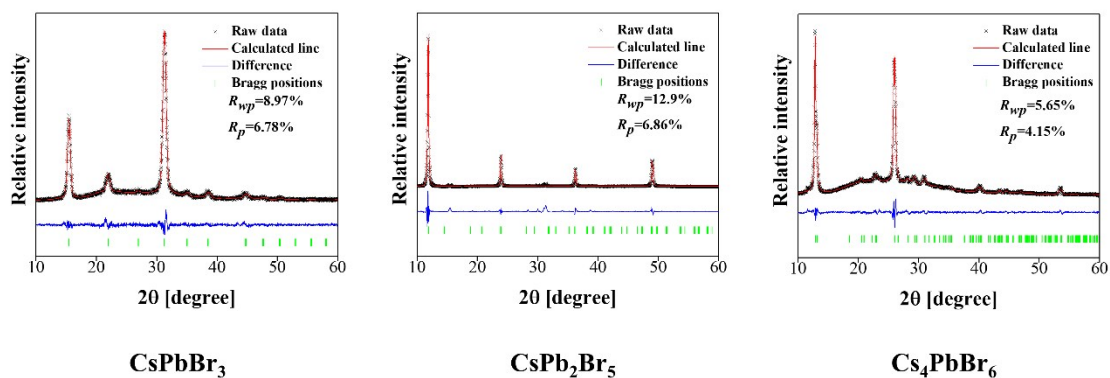

**Figure S10.** XRD refinement results for CsPbBr<sub>3</sub>, CsPb<sub>2</sub>Br<sub>5</sub> and Cs<sub>4</sub>PbBr<sub>6</sub> NCs

**Table S2.** Rietveld refinement and crystal data for CsPbBr<sub>3</sub> NCs

| Cell parameter                                     |           |           | Reliability factors                          |           |
|----------------------------------------------------|-----------|-----------|----------------------------------------------|-----------|
| a=b=c=5.729Å                                       |           |           | Rwp(%)=8.97                                  |           |
| $\alpha=\beta=\gamma=90^\circ$                     |           |           | Rp(%)=6.98                                   |           |
| Cell volume=488.05Å <sup>3</sup>                   |           |           | Chi <sup>2</sup> =1.30                       |           |
| Radiation(Å): Cu-K $\alpha$ ( $\lambda$ =1.54056Å) |           |           | Density=5.120g/cm <sup>3</sup>               |           |
| Space group: P m -3 m, cubic                       |           |           | Calculated unit cell formula weight: 579.817 |           |
| Atom                                               | X         | Y         | Z                                            | Occupancy |
| Cs                                                 | 0.0000000 | 0.0000000 | 0.000000                                     | 1.000     |
| Pb                                                 | 0.500000  | 0.500000  | 0.500000                                     | 1.000     |
| Br                                                 | 0.500000  | 0.500000  | 0.000000                                     | 1.000     |

**Table S3.** Rietveld refinement and crystal data for CsPb<sub>2</sub>Br<sub>5</sub> NSs

| Cell parameter                                     |          |          | Reliability factors            |                   |
|----------------------------------------------------|----------|----------|--------------------------------|-------------------|
| a=b=8.589Å, c=14.911Å                              |          |          | Rwp(%)=12.9                    |                   |
| $\alpha=\beta=\gamma=90^\circ$                     |          |          | Rp(%)=6.86                     |                   |
| Cell volume=1099.93Å <sup>3</sup>                  |          |          | Chi <sup>2</sup> =10.67        |                   |
| Radiation(Å): Cu-K $\alpha$ ( $\lambda$ =1.54056Å) |          |          | Density=5.718g/cm <sup>3</sup> |                   |
| Space group: I 4/m c m, tetragonal                 |          |          | Calculated                     | unit cell formula |
|                                                    |          |          | weight: 3787.300               |                   |
| Atom                                               | X        | Y        | Z                              | Occupancy         |
| Cs                                                 | 0.500000 | 0.500000 | 0.750000                       | 1.000             |
| Pb                                                 | 0.308164 | 0.808164 | 0.500000                       | 1.000             |
| Br1                                                | 0.500000 | 0.500000 | 0.500000                       | 1.000             |
| Br2                                                | 0.202558 | 0.702556 | 0.629432                       | 1.000             |

**Table S4.** Rietveld refinement and crystal data for Cs<sub>4</sub>PbBr<sub>6</sub> NCs

| Cell parameter                                     |          |          | Reliability factors            |                   |
|----------------------------------------------------|----------|----------|--------------------------------|-------------------|
| a=b=13.400Å, c=16.936Å                             |          |          | Rwp(%)=5.65                    |                   |
| $\alpha=\beta=90^\circ$ , $\gamma=120^\circ$       |          |          | Rp(%)=4.15                     |                   |
| Cell volume=2633.662Å <sup>3</sup>                 |          |          | Chi <sup>2</sup> =0.18         |                   |
| Radiation(Å): Cu-K $\alpha$ ( $\lambda$ =1.54056Å) |          |          | Density=4.609g/cm <sup>3</sup> |                   |
| Space group: R -3 c, hexagonal                     |          |          | Calculated                     | unit cell formula |
|                                                    |          |          | weight: 7309.464               |                   |
| Atom                                               | X        | Y        | Z                              | Occupancy         |
| Cs1                                                | 0.706000 | 0.666700 | 0.916700                       | 1.000             |
| Cs2                                                | 0.000000 | 0.000000 | 0.250000                       | 1.000             |
| Pb                                                 | 0.000000 | 0.000000 | 0.000000                       | 1.000             |
| Br                                                 | 0.010603 | 0.824400 | 0.891600                       | 1.000             |
